# Supplementary material for: Visible-light driven H2 evolution over a precious metal-free hybrid photocatalyst constructed from CuO and NiFe layered double hydroxide
Source: Royal Society of Chemistry journal article supplement (doi:10.1039/d2cy00958g), 2022-11-10
Supplement: d2cy00958g1.pdf [file d2cy00958g1.pdf]

Supplementary Information

Chomponoot Suppaso,<sup>a</sup> Chadawan Khamdang,<sup>b</sup> Likkhasit Wannasen,<sup>c</sup> Tomoki Kanazawa,<sup>d</sup>  
Akinobu Miyoshi,<sup>e</sup> Shunta Nishioka,<sup>e</sup> Kaewta Jetsrisuparb,<sup>f</sup> Sujitra Amnuaypanich,<sup>a</sup> Suwit  
Suthirakun,<sup>b</sup> Kazuhiko Maeda<sup>e, \*</sup> and Nithima Khaorapapong<sup>a, \*</sup>

*<sup>a</sup>Materials Chemistry Research Center, Department of Chemistry and Center of Excellence  
for Innovation in Chemistry, Faculty of Science, Khon Kaen 40002, Thailand*

*<sup>b</sup>School of Chemistry, Institute of Science, Suranaree University of Technology, Nakhon  
Ratchasima, Thailand 30000*

*<sup>c</sup>Nanotec-KKU Center of Excellence on Advanced Nanomaterials for Energy Production and  
Storage, Department of Physics, Faculty of Science, Khon Kaen University, Khon Kaen  
40002, Thailand*

*<sup>d</sup>Institute of Materials Structure Science, High Energy Accelerator Research Organization, 1-1 Oho,  
Tsukuba, Ibaraki 305-0801, Japan.*

*<sup>e</sup>Department of Chemistry, Graduate School of Science and Engineering, Tokyo  
Institute of Technology, 2-12-1-NE-2 Ookayama, Meguro-ku, Tokyo 152-8550, Japan.*

*<sup>f</sup>Department of Chemical Engineering, Khon Kaen University, Khon Kaen 40002, Thailand*

Corresponding author

N.K. [nithima@kku.ac.th](mailto:nithima@kku.ac.th),

K.M. [maedak@chem.titech.ac.jp](mailto:maedak@chem.titech.ac.jp)

## Structural properties

Before the study properties of CuO (111), NiO (111), NiFe<sub>2</sub>O<sub>4</sub> (311), and NiFe LDH (003), bulk structures are explored firstly, as shown in Fig. S1. CuO has a monoclinic structure, and the lattice constants  $a = 4.53 \text{ \AA}$ ,  $b = 3.54 \text{ \AA}$ ,  $c = 5.12 \text{ \AA}$ , and  $\beta = 99.19^\circ$  are in good agreement with experimental values ( $a = 4.68 \text{ \AA}$ ,  $b = 3.42 \text{ \AA}$ ,  $c = 5.13 \text{ \AA}$ , and  $\beta = 99.53^\circ$ ).<sup>1</sup> NiO has a cubic structure, results in the optimized lattice constant of  $a = 4.16 \text{ \AA}$ , which compares favorably with the experimental value of  $a = 4.17 \text{ \AA}$ .<sup>2</sup> NiFe<sub>2</sub>O<sub>4</sub> crystallizes in the  $\alpha$  type inverse spinel, which has a tetragonal P4122/P4322 symmetry. Equal numbers of Ni and Fe atoms occupy octahedral sites, while the remaining Fe atoms occupy tetrahedral sites, the lattice constant has obtained a value of  $8.10 \text{ \AA}$  compared to the experimental value was  $8.33 \text{ \AA}$ .<sup>3</sup> NiFe LDH the lattice constants  $a = 12.21 \text{ \AA}$ ,  $b = 6.10 \text{ \AA}$ ,  $c = 22.40 \text{ \AA}$ , and the interlayer spacing is  $8.54 \text{ \AA}$  with good agreement with the experiment value ( $8.29 \text{ \AA}$ ).<sup>4</sup>

After complete optimization of bulk structures, slab models were studied, as shown in Fig. S2. CuO (111) 6 layers slab model with top three atomic layers are allowed to fully relax in all of the geometry optimization calculations and the 3 bottom layers are kept fixed, lattice constants were  $a = 5.75 \text{ \AA}$ ,  $b = 6.22 \text{ \AA}$ ,  $c = 27.56 \text{ \AA}$ , and  $\beta = 104.28^\circ$  are good agreement with experimental values ( $a = 5.77 \text{ \AA}$ ,  $b = 6.14 \text{ \AA}$ , and  $c = 23.07 \text{ \AA}$ ).<sup>5</sup> NiO (111) 6 layers slab model with top 3 atomic layers are allowed to relax and the 3 bottom layers are fixed, the lattice constants were  $a = 5.88 \text{ \AA}$ ,  $c = 21.00 \text{ \AA}$ , and  $\gamma = 60.00^\circ$ . On the previous study of NiO (111) surface, there have studied on both oxygen- and metal-terminated surfaces of NiO (111), which find the O-terminated surface to be slightly more stable than the M-terminated surface, so we choose the O-terminated surface for NiO (111) in this study.<sup>6</sup> NiFe<sub>2</sub>O<sub>4</sub> (311) surface using symmetric slabs of 12 layers with top 6 atomic layers are allowed to relax and the 6 bottom layers are fixed, the configurations we consider were O-termination, Fe-termination and Ni-termination, which the result shows that O-termination becomes most

stable surface for  $\text{NiFe}_2\text{O}_4$  (311). Finally, NiFe LDH (003) surface model contain of one-layer metal hydroxides. The mole ratio of Ni and Fe in the original NiFe LDH (003) surface model is 3:1, the hydrogen atoms on the upper layer were removed for the adsorption of water and hydrogen intermediates.<sup>7</sup> All the slab models using the vacuum of 15.00 Å is employed, which can eliminate the interaction between surface slabs.

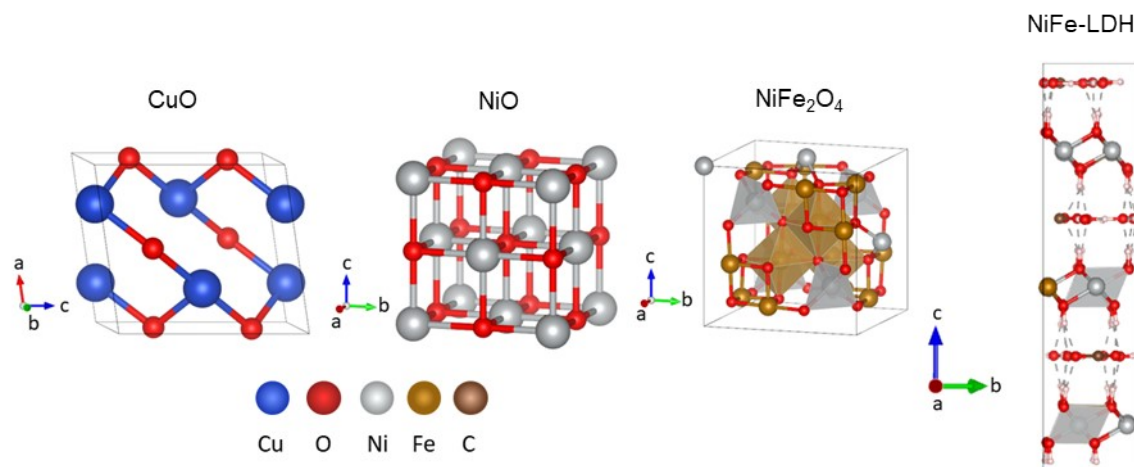

**Fig. S1** The optimized bulk structure of (a) CuO, (b) NiO, (c)  $\text{NiFe}_2\text{O}_4$ , and (d) NiFe LDH.

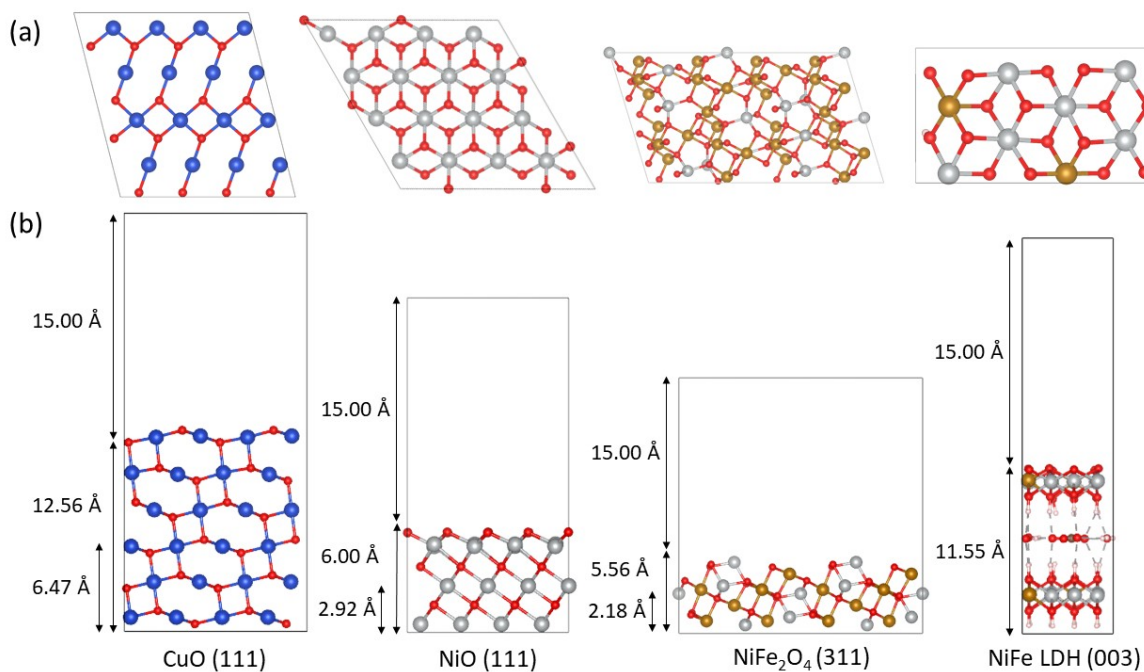

**Fig. S2** a) top view and b) side view of slab models of CuO (111), NiO (111),  $\text{NiFe}_2\text{O}_4$  (311), and NiFe LDH (003).

## Energy diagram

Among the possible adsorption sites on the CuO (111), NiO (111), NiFe<sub>2</sub>O<sub>4</sub> (311), and NiFe LDH (003) the most stable molecular adsorption of water and hydrogen co-adsorption are shown in Fig. S3. The adsorption energy,  $E_{ads}$ , is defined as

$$E_{ads} = E_{H^*} - (E_{*} + 1/2E_{H_2})$$

where  $E_{*}$  and  $E_{H^*}$  are the total energies of bare surface and adsorbed H atom on the surface, respectively; and  $E_{H_2}$  is the total energy of an isolated H<sub>2</sub> molecule. The adsorption for H-O (O atom of the surface) with a distance of 1.00 Å.<sup>8</sup> In Fig. S3(a), the distance between H<sub>2</sub>O and H adsorbed is 1.77 Å, and H<sub>2</sub>O with surface O atom is 1.75 Å. In Figure 3b, the distance between H<sub>2</sub>O and H adsorbed is 1.60 Å, and H<sub>2</sub>O with surface O atom is 2.01 Å. In Fig. S3(c), the distance between H<sub>2</sub>O and H adsorbed is 1.71 Å, and H<sub>2</sub>O with surface O atom is 2.28 Å. In Figure S3(d), the distance between H<sub>2</sub>O and H adsorbed is 1.78 Å, and H<sub>2</sub>O with surface O atom is 2.01 Å. The adsorption energies of the four models are in the following order: (b) > (d) > (a) > (c) it is indicated that the NiO (111) surface was the most stable surface for water and hydrogen co-adsorption.

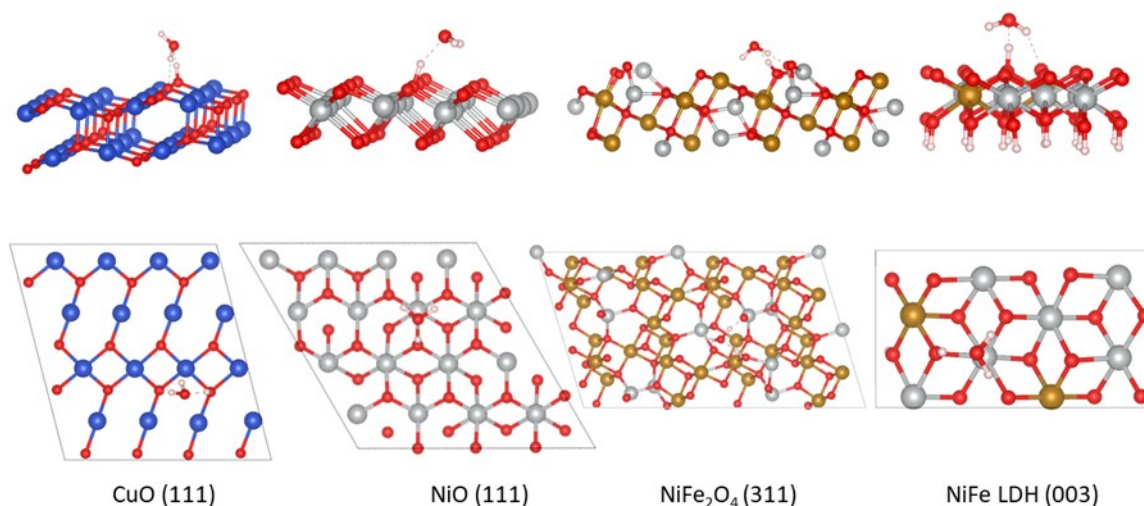

**Fig. S3** Side view and top view of stable configuration for water and hydrogen co-adsorption on a) CuO (111), b) NiO (111), c) NiFe<sub>2</sub>O<sub>4</sub> (001), and d) NiFe LDH (003).

The schematic of the HER activity of a given surface is determined through the free energy of adsorbed hydrogen under equilibrium conditions of the reaction. The adsorption free energy corresponding to the HER mechanism is defined as<sup>9</sup>

$$\Delta G_{H^*} = E_{ads} + \Delta ZPE - T\Delta S$$

where  $E_{ads}$  signifies the adsorption energy of water and hydrogen co-adsorption,  $\Delta ZPE$  is the change in the zero-point energy ( $ZPE$ ) of hydrogen in the adsorbed state and gas phase, and  $T\Delta S$  represents the entropy difference of water and hydrogen co-adsorption in the adsorbed and gas state, i.e., vibration, rotation, and translation of gas-phase species; for adsorbed species, only vibrational contributions were considered since rotational and translational motions become frustrated. The  $ZPE$  correction was calculated according to

$$ZPE = \frac{hc}{2} \sum_i^k \frac{1}{\lambda_i}$$

where  $h$  is the Planck constant,  $c$  is the speed of light,  $\lambda_i$  the wavelength corresponding to the  $i$ -th vibrational mode, and  $k$  is the number of vibrational modes. The vibrational entropy  $S_{vib}$  was calculated assuming that each mode behaves like a harmonic oscillator, as shown in the following

$$S_{vib} = R \sum_i^k \left( \frac{x_i}{e^{x_i} - 1} - \ln(1 - e^{-x_i}) \right)$$

where,  $x_i = \frac{hc}{k_B T \lambda_i}$ ,  $R$  is the ideal gas constant,  $k_B$  is the Boltzmann constant, and  $T$  the reaction temperature.<sup>10</sup>

**Table S1** Calculated BET surface area of the as-prepared and calcined products.

| Samples                           | BET surface area/ m <sup>2</sup> g <sup>-1</sup> |                   |
|-----------------------------------|--------------------------------------------------|-------------------|
|                                   | As-prepared product                              | After calcination |
| NiFe-LDH                          | 69                                               | 15                |
| Composites                        |                                                  |                   |
| -prepared by hydrothermal         | 44                                               | 25                |
| -prepared by solid state reaction | 41                                               | 23                |
| -prepared by physical mixing      | 40                                               | 20                |
| CuO                               | 16                                               |                   |

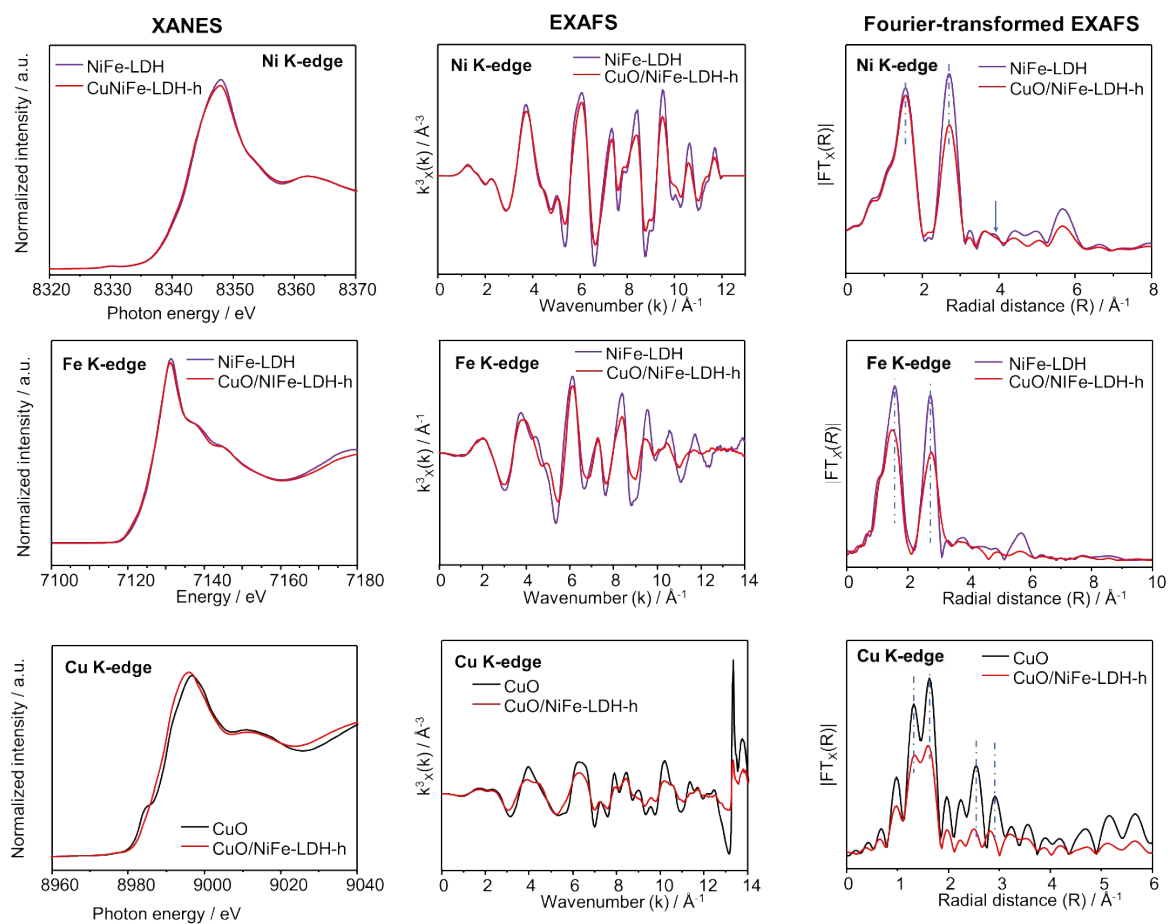

**Fig. S4** The XAFS results including XANES (left), EXAFS (middle) and Fourier-transformed EXAFS (right) spectra of Ni K-edge (top), Fe K-edge (middle) and Cu K-edge (bottom) of the NiFe-LDH, CuO and CuO/NiFe-LDH-h.

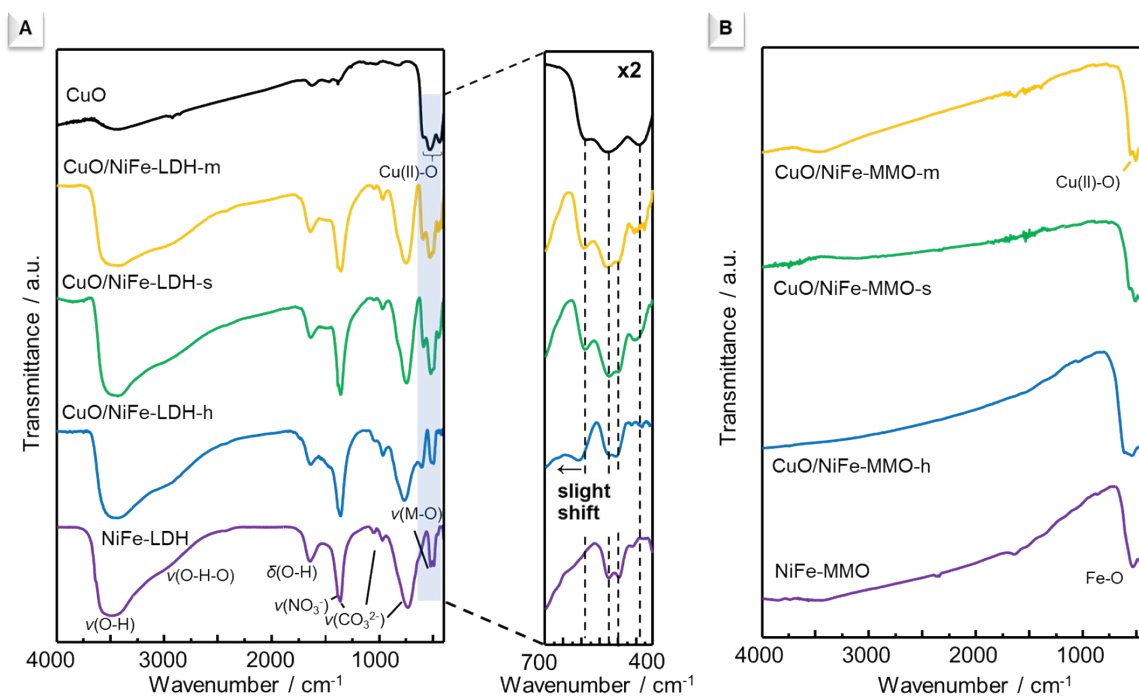

**Fig. S5** FTIR spectra of CuO/NiFe-LDH composites (A) and their calcined products (B).



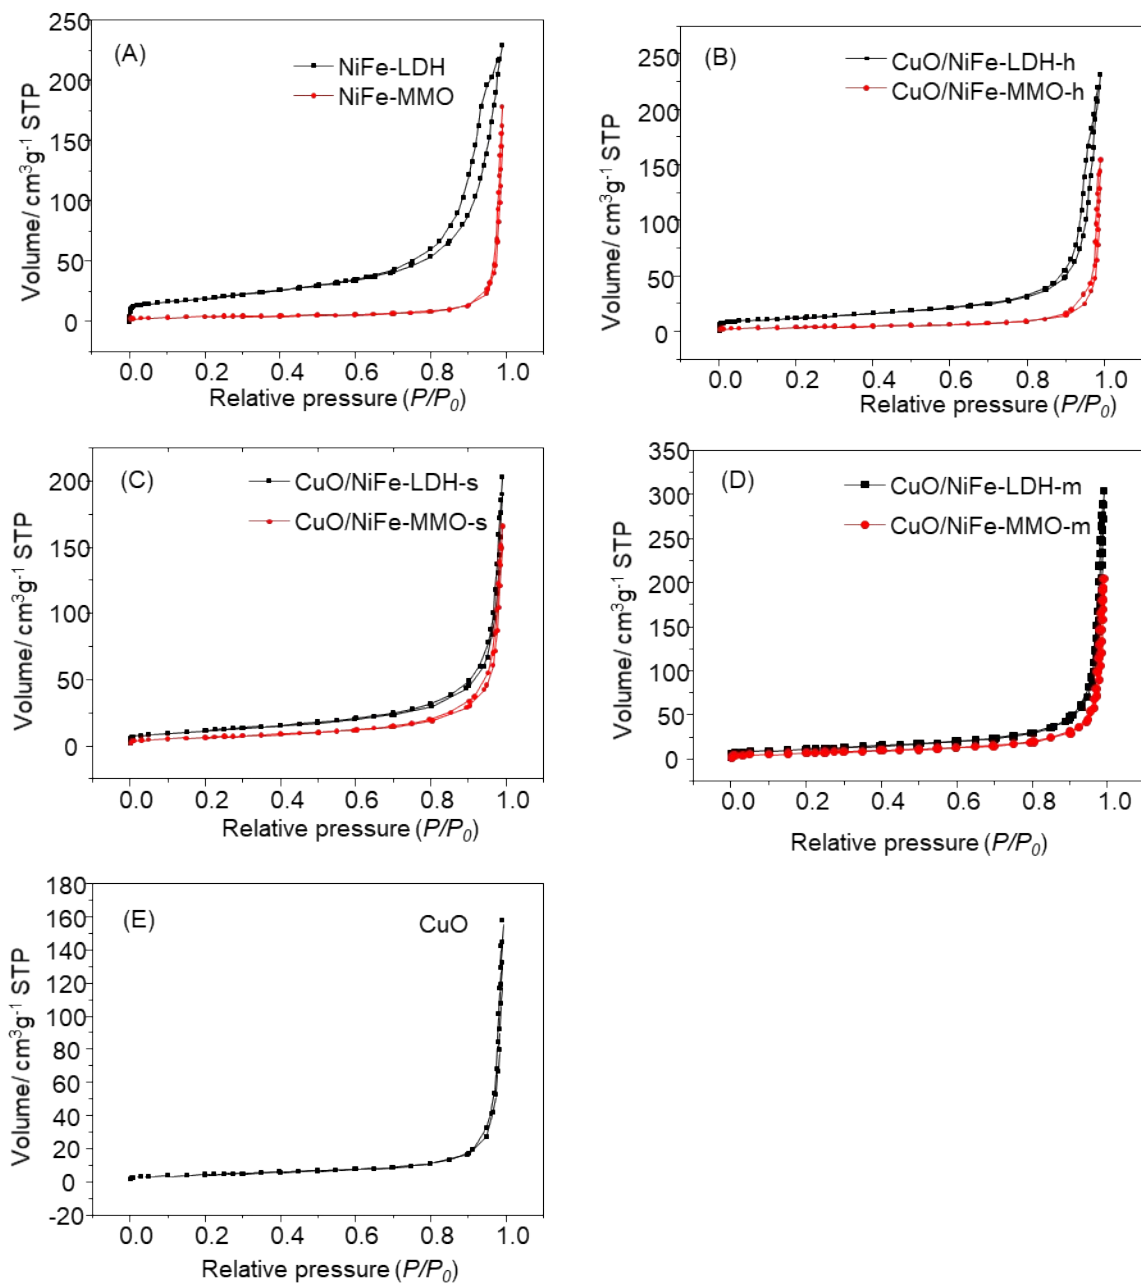

**Fig. S6**  $N_2$  adsorption-desorption isotherms of (A) pristine NiFe-LDH, CuO/NiFe-LDH composite prepared by (B) hydrothermal, (C) solid-state reaction and (D) physical mixing and (E) pure CuO.

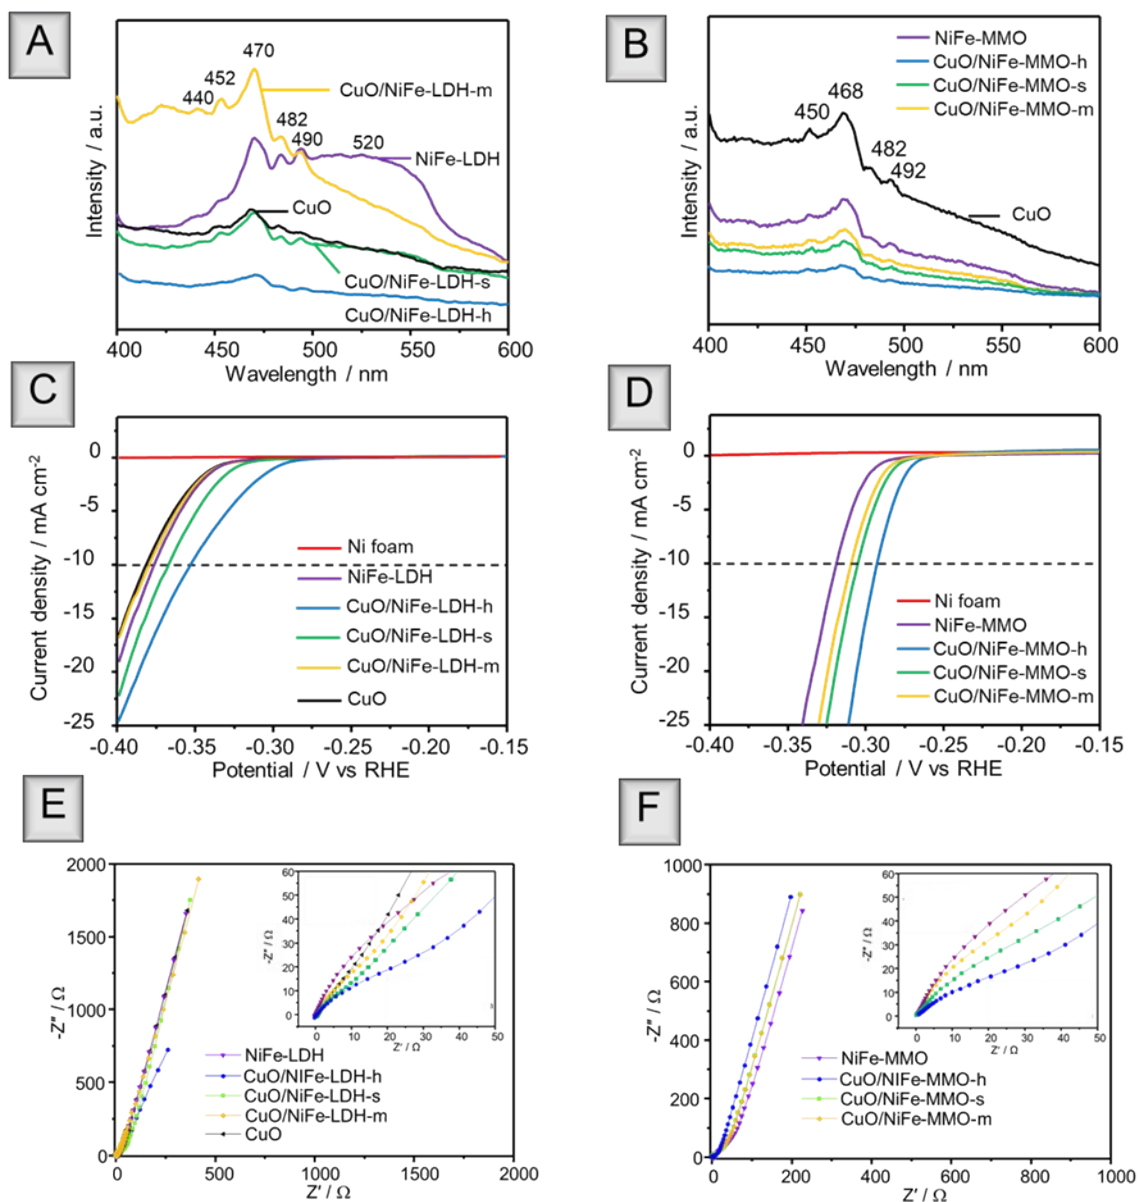

**Fig. S7** (A, B) PL emission spectra with an excitation wavelength of 350 nm, (C, D) LSV spectra and (E, F) Nyquist plots of CuO/NiFe-LDH composites (left) and their calcined products (right). The EIS data were fitted to equivalent circuit model according to the previous report<sup>11</sup>.

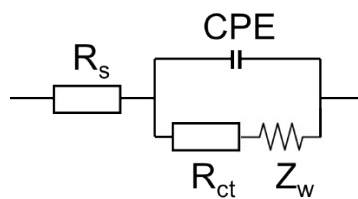

where  $R_s$  and  $R_{ct}$  represent bulk electrolyte and charge transfer resistances, respectively. The constant phase element or CPE equals to a double-layer capacitance, while, Warburg impedance or  $Z_w$  represents the diffusion of the ion in an electrolyte.

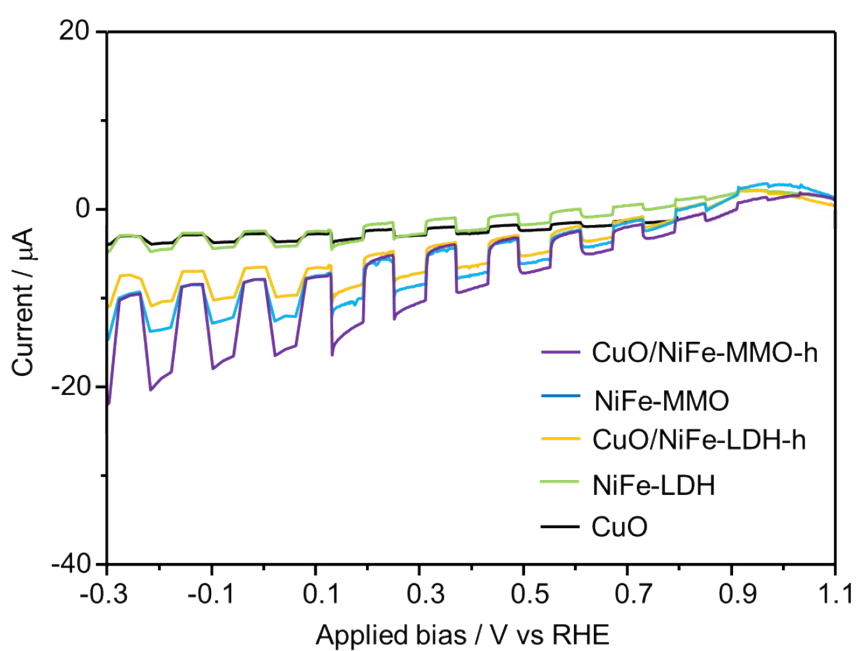

**Fig. S8** Linear sweep voltammetry of prepared sample/FTO electrodes under visible-light chopped illumination (300 W Xe lamp,  $\lambda > 400$  nm) in 0.1 M  $\text{Na}_2\text{SO}_4$  solution.

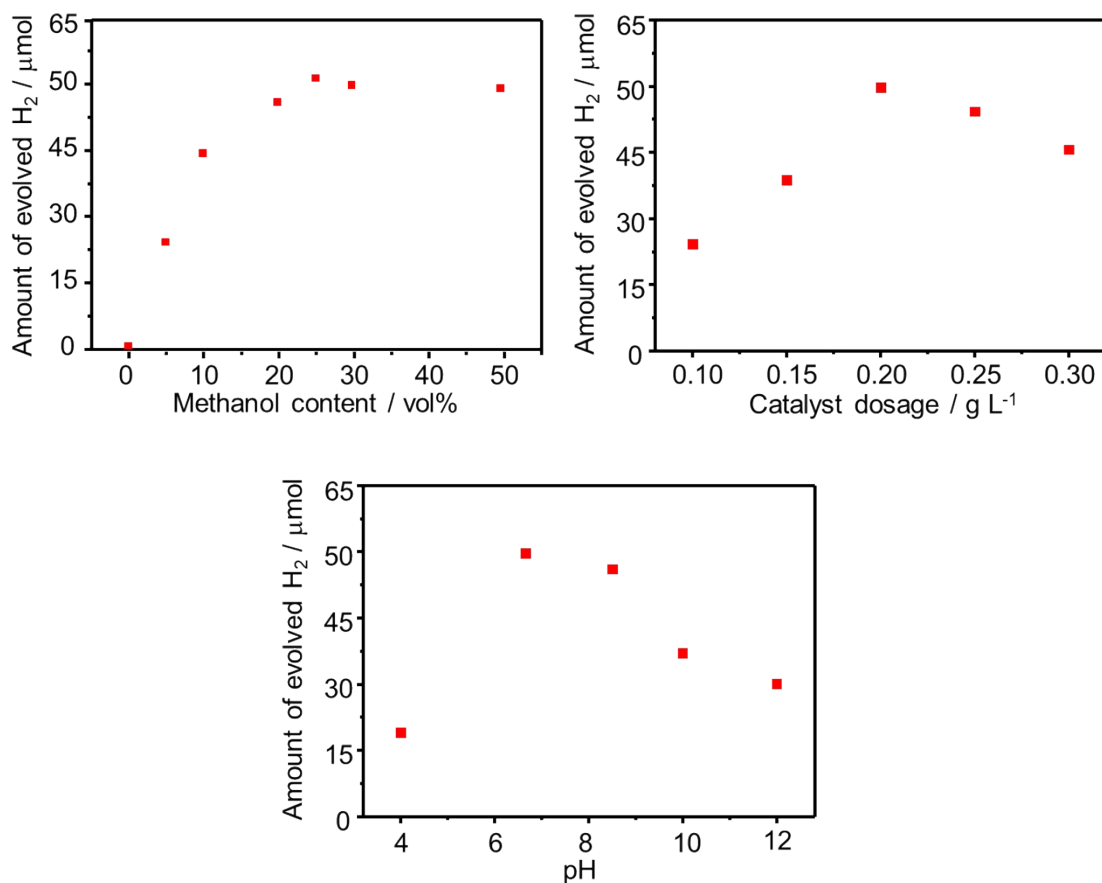

**Fig. S9** Effect of methanol concentration (left), catalyst dosage (right) and pH (centre) on the photocatalytic H<sub>2</sub> production over CuO/NiFe-MMO-h. Reaction conditions: catalyst, 50, 75, 100, 125 and 150 mg; 0-50 %vol methanol aqueous solution, 500 mL; light source, high pressure mercury lamp (100 W, HL-100, SEN LIGHTS Corporation,  $\lambda \approx 250-580$  nm); irradiation time, 6 h.

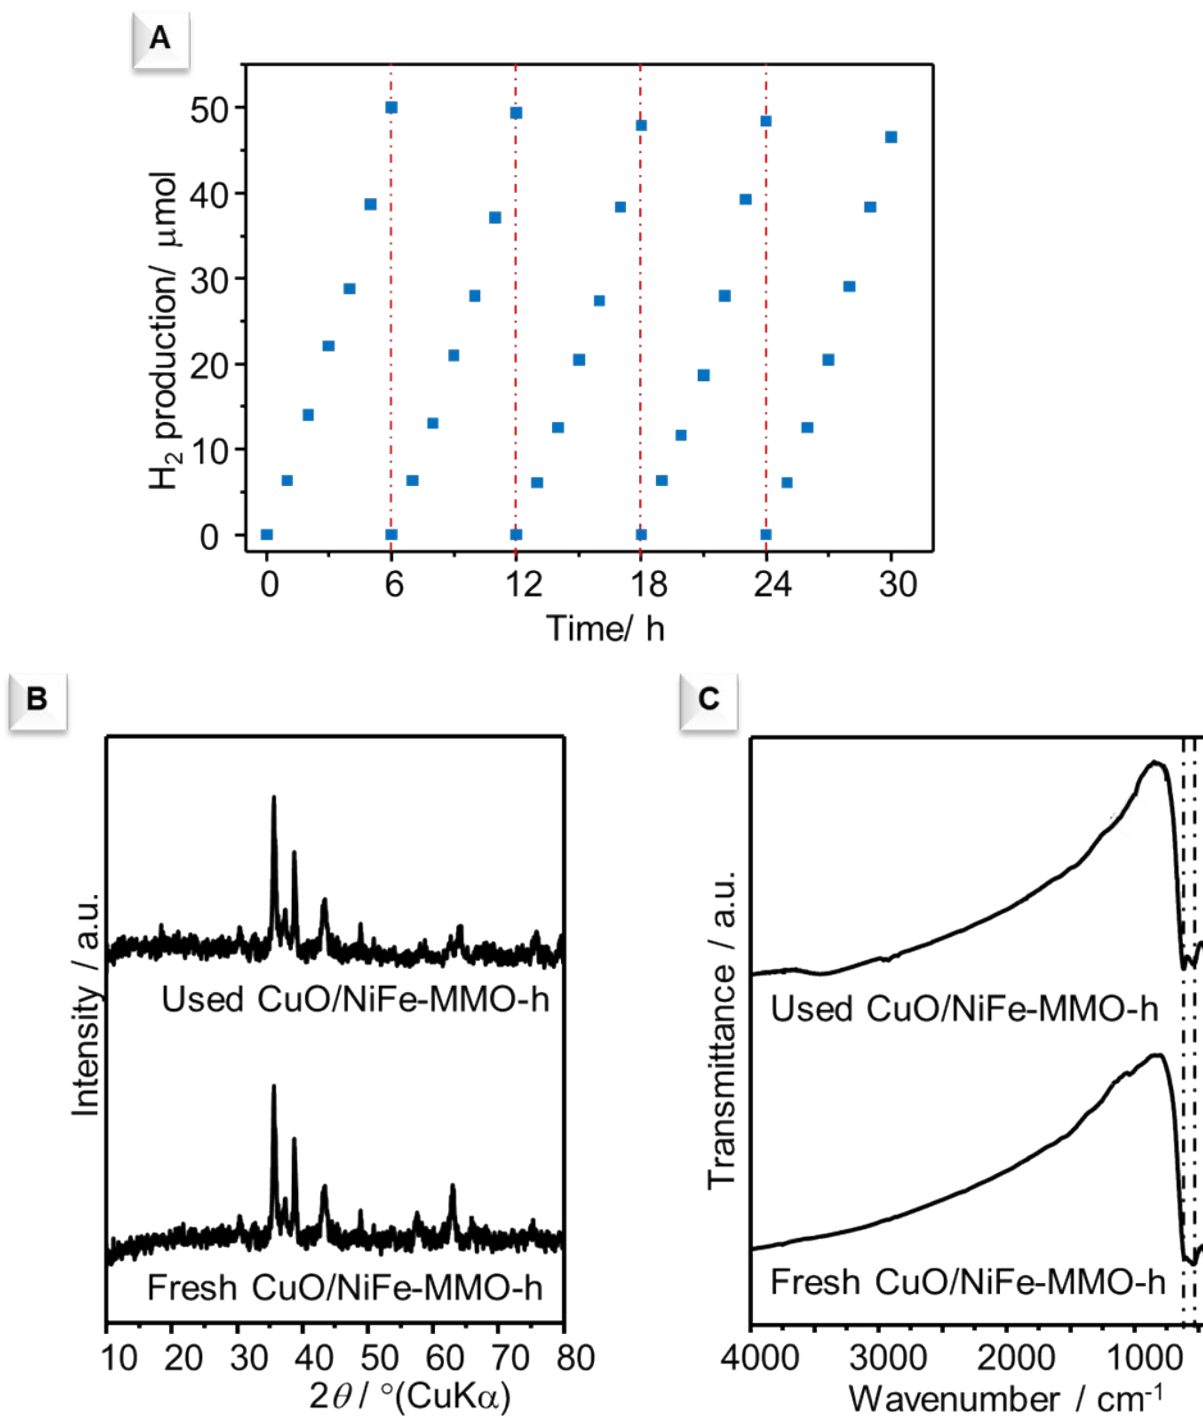

**Fig. S10** (A) Photocatalytic cycling test, (B) FTIR spectra and (C) XRD patterns of CuO/NiFe-MMO-h before and after photocatalytic H<sub>2</sub> production reaction.

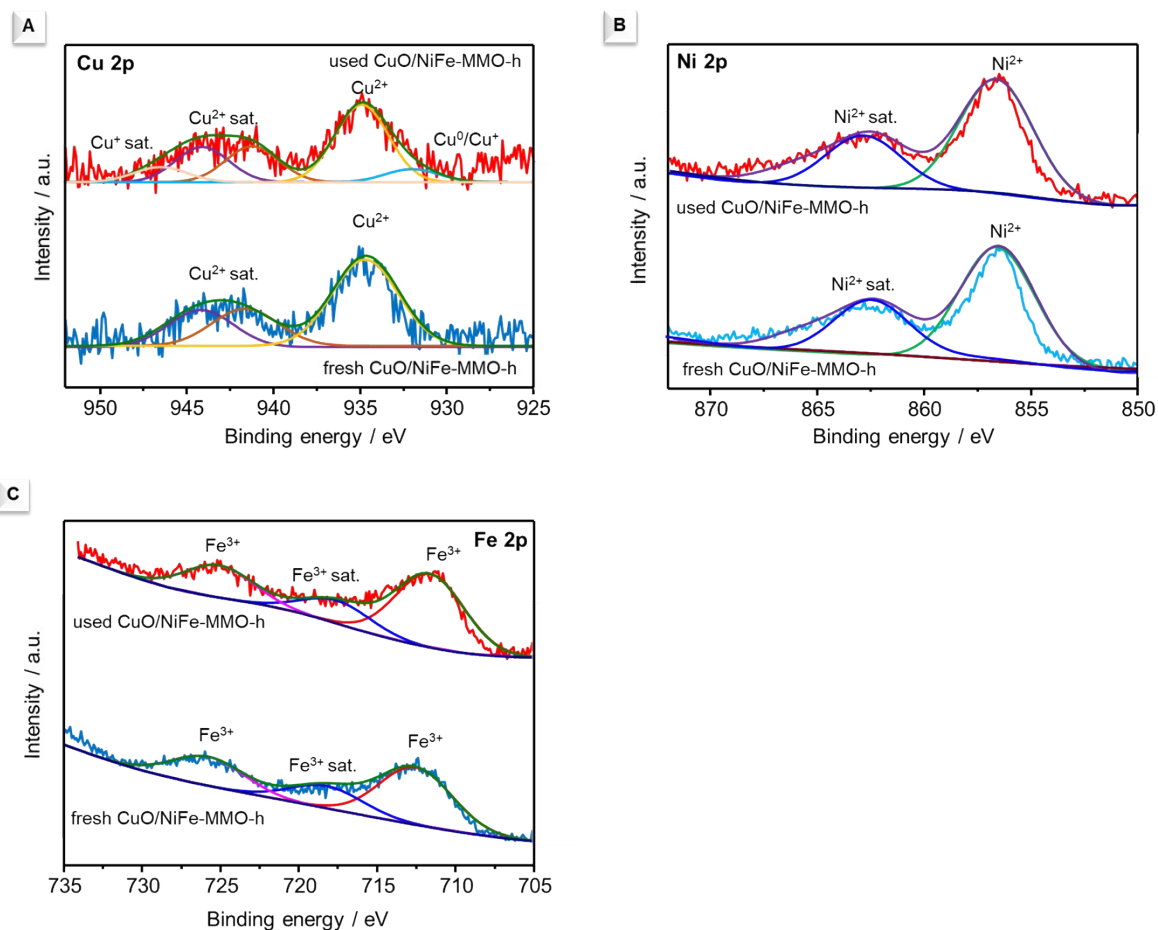

**Fig. S11** XPS spectra of (A) Cu 2p, (B) Ni 2p and (C) Fe 2p for CuO/NiFe-MMO-h collected before (blue line) and after (red line) photocatalytic H<sub>2</sub> production reaction.

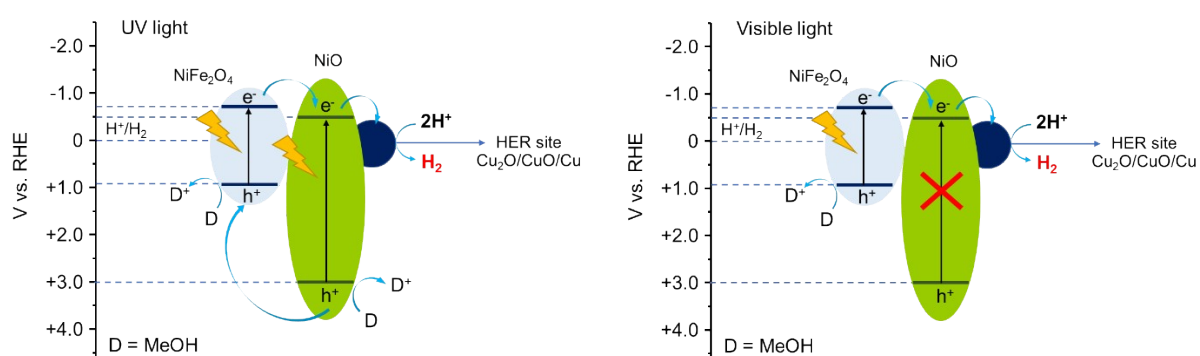

**Fig. S12** Proposed photocatalytic mechanism using CuO/NiFe-MMO-h as a photocatalyst.

## References

1. V. Oison, H. Ouali, C. Lambert-Mauriat and M. Freyss, *Surface science*, 2014, **622**, 44-50.
2. M. Nolan, R. Long, N. J. English and D. A. Mooney, *The Journal of chemical physics*, 2011, **134**, 224703.
3. X. Shi, Y.-F. Li, S. L. Bernasek and A. Selloni, *Surface Science*, 2015, **640**, 73-79.
4. A. C. Thenuwara, N. H. Attanayake, J. Yu, J. P. Perdew, E. J. Elzinga, Q. Yan and D. R. Strongin, *The Journal of Physical Chemistry B*, 2018, **122**, 847-854.
5. X. Yu, X. Zhang, H. Wang and G. Feng, *Applied Surface Science*, 2017, **425**, 803-810.
6. W. Zhao, M. Bajdich, S. Carey, A. Vojvodic, J. K. Nørskov and C. T. Campbell, *Acs Catalysis*, 2016, **6**, 7377-7384.
7. X. Wang, Y. Tuo, Y. Zhou, D. Wang, S. Wang and J. Zhang, *Chemical Engineering Journal*, 2021, **403**, 126297.
8. S. Sun, D. Zhang, C. Li and Y. Wang, *RSC Advances*, 2015, **5**, 21806-21811.
9. N. Zhao, L. Wang, Z. Zhang and Y. Li, *ACS applied materials & interfaces*, 2019, **11**, 42014-42020.
10. Y. Bai, B. W. Chen, G. Peng and M. Mavrikakis, *Catalysis Science & Technology*, 2018, **8**, 3321-3335.
11. Y. Liu and Z. Yang, *RSC Advances*, 2016, **6**, 68584-68591.
